# Supplementary material
Source: MDPI journal article supplement (https://www.mdpi.com/2075-163X/4/2/293)

## Supplementary Information

**Figure S1.** Comparison of TXRF and ICP-MS results for the measurement of Sulfur ( $\mu\text{g/L}$ ).

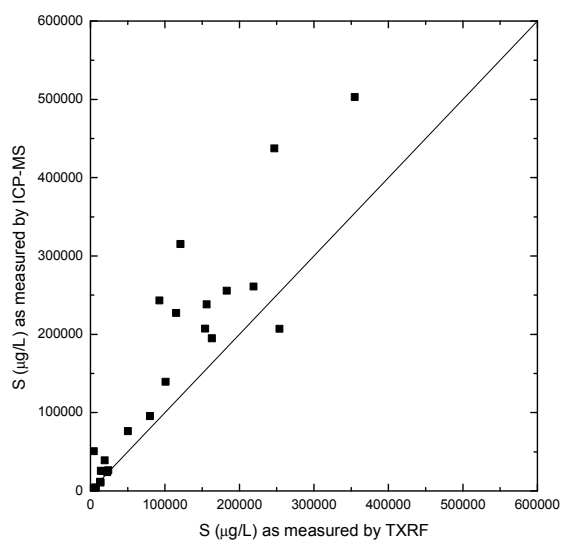

**Figure S2.** Comparison of TXRF and ICP-MS results for the measurement of Iron ( $\mu\text{g/L}$ ).

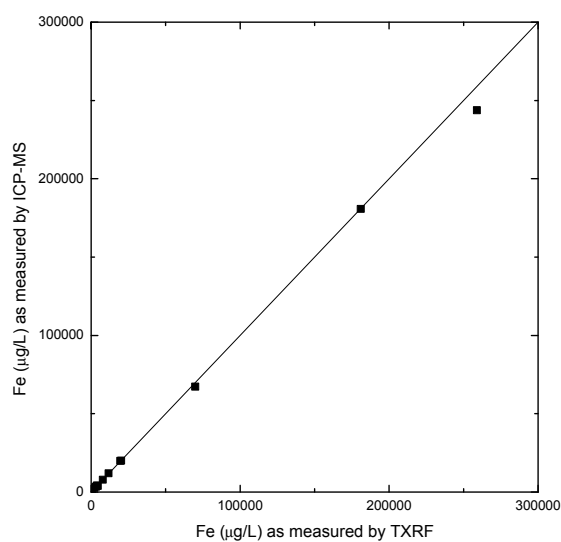

**Figure S3.** Comparison of TXRF and ICP-MS results for the measurement of Nickel ( $\mu\text{g/L}$ ).

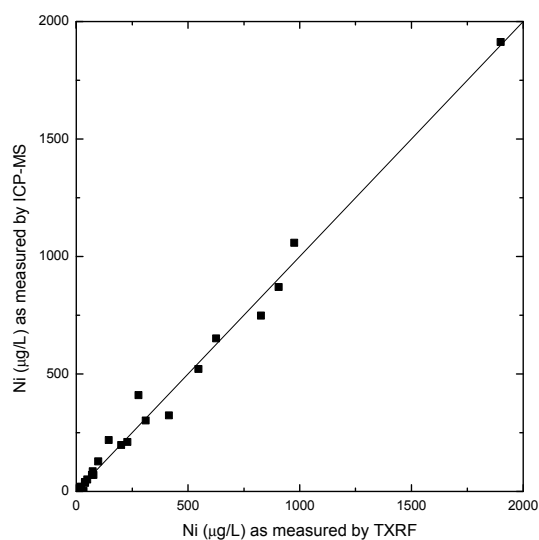

**Figure S4.** Comparison of TXRF and ICP-MS results for the measurement of Copper ( $\mu\text{g/L}$ ).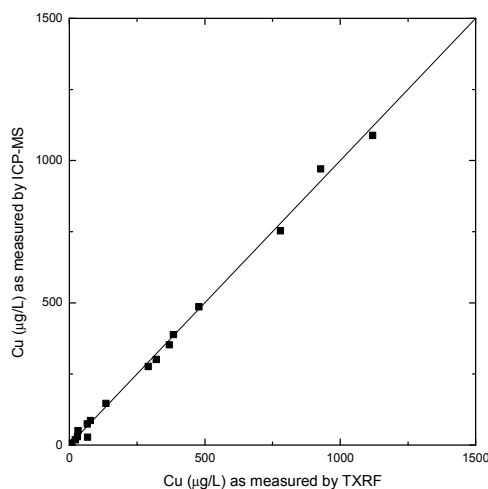**Figure S5.** Comparison of TXRF and ICP-MS results for the measurement of Zinc ( $\mu\text{g/L}$ ).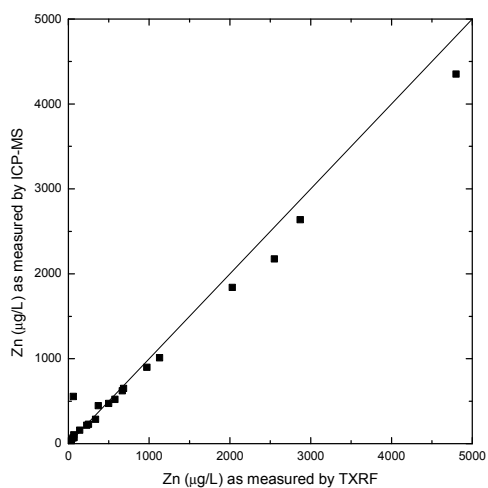**Figure S6.** Comparison of TXRF and ICP-MS results for the measurement of Manganese ( $\mu\text{g/L}$ ).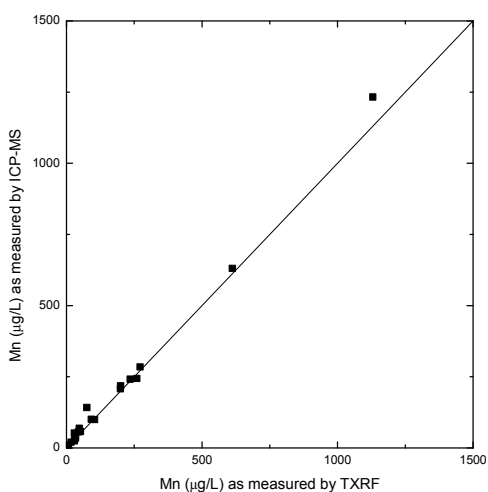

Supplement: s1 [file s1]
