# Supplementary material
Source: MDPI journal article supplement (https://www.mdpi.com/2075-163X/4/2/293)
Supplement: s2 [file s2]

## Sheet: Leachate_ShaleA-H
Sample	Days	S (mg/L)	Cl (mg/L)	Ca (mg/L)	Cr (mg/L)	Mn (mg/L)	Fe (mg/L)	Co (mg/L)	Ni (mg/L)	Cu (mg/L)	Zn (mg/L)	As (mg/L)	Pb (mg/L)			Days	S (mg/L)	Cl (mg/L)	Ca (mg/L)	Cr (mg/L)	Mn (mg/L)	Fe (mg/L)	Co (mg/L)	Ni (mg/L)	Cu (mg/L)	Zn (mg/L)	As (mg/L)	Pb (mg/L)			Days	S (mg/L)	Cl (mg/L)	Ca (mg/L)	Cr (mg/L)	Mn (mg/L)	Fe (mg/L)	Co (mg/L)	Ni (mg/L)	Cu (mg/L)	Zn (mg/L)	As (mg/L)	Pb (mg/L)			Days	S (mg/L)	Cl (mg/L)	Ca (mg/L)
LOD (mg/L)		0.273	0.167	0.057	0.018	0.016	0.011	0.01	0.008	0.007	0.007	0.004	0.004		LOD (mg/L)		0.273	0.167	0.057	0.018	0.016	0.011	0.01	0.008	0.007	0.007	0.004	0.004		LOD (mg/L)		0.273	0.167	0.057	0.018	0.016	0.011	0.01	0.008	0.007	0.007	0.004	0.004		LOD (mg/L)		0.273	0.167	0.057
Half LOD (mg/L)		0.137	0.084	0.029	0.009	0.008	0.006	0.005	0.004	0.004	0.004	0.002	0.002		Half LOD (mg/L)		0.137	0.084	0.029	0.009	0.008	0.006	0.005	0.004	0.004	0.004	0.002	0.002		Half LOD (mg/L)		0.137	0.084	0.029	0.009	0.008	0.006	0.005	0.004	0.004	0.004	0.002	0.002		Half LOD (mg/L)		0.137	0.084	0.029
Shale A															Shale B															Shale C															Shale D
A_2_1_1	0.042	605	0.084	2.14	0.009	0.008	1.51	0.005	0.175	0.088	0.265	0.04	0.086		B_2_1_1	0.042	280	0.084	2.51	0.009	0.008	0.48	0.005	0.141	0.08	0.09	0.002	0.035		C_2_1_1	0.042	169	0.084	6	0.009	0.014	1.64	0.005	0.033	0.034	0.066	0.007	0.029		D_2_1_1	0.042	115	0.084	5.01
A_2_1_2	0.083	242	0.084	11.6	0.009	0.076	3.12	0.005	0.202	0.218	0.442	0.002	0.04		B_2_1_2	0.083	263	0.084	6.66	0.009	0.008	0.807	0.005	0.117	0.077	0.111	0.002	0.066		C_2_1_2	0.083	188	0.084	16.7	0.009	0.023	3.35	0.005	0.071	0.073	0.118	0.009	0.03		D_2_1_2	0.083	124	0.084	7.8
A_2_1_4	0.167	320	0.084	12.1	0.009	0.137	4.37	0.005	0.278	0.16	0.626	0.002	0.069		B_2_1_4	0.167	198	0.084	12.2	0.009	0.045	1.17	0.012	0.183	0.157	0.225	0.01	0.034		C_2_1_4	0.167	153	0.084	8.39	0.009	0.05	5.29	0.005	0.089	0.116	0.18	0.013	0.023		D_2_1_4	0.167	101	0.084	17.4
A_2_1_8	0.333	101	0.084	11.9	0.009	0.147	6.01	0.023	0.285	0.191	0.704	0.015	0.026		B_2_1_8	0.333	189	0.169	21.8	0.009	0.077	2.18	0.017	0.181	0.18	0.28	0.018	0.031		C_2_1_8	0.333	128	0.084	14.4	0.009	0.037	9.59	0.005	0.107	0.149	0.225	0.02	0.027		D_2_1_8	0.333	130	0.084	38
A_2_1_24	1	100	1.34	19.5	0.009	0.173	9.53	0.02	0.37	0.246	0.879	0.022	0.044		B_2_1_24	1	166	0.084	20.9	0.008	0.091	5.08	0.02	0.252	0.247	0.451	0.036	0.022		C_2_1_24	1	165	0.084	24.5	0.008	0.047	11.4	0.005	0.129	0.209	0.276	0.028	0.032		D_2_1_24 (missing)	1
A_2_1_48	2	156	0.084	24.4	0.009	0.226	13.9	0.045	0.439	0.305	1	0.035	0.024		B_2_1_48	2	167	0.084	26.2	0.009	0.094	8.26	0.027	0.318	0.297	0.598	0.047	0.033		C_2_1_48	2	117	0.084	22.1	0.009	0.067	14.3	0.005	0.123	0.22	0.289	0.029	0.025		D_2_1_48	2	136	4.44	20
A_2_1_96	4	183	0.084	28.1	0.009	0.235	20.3	0.005	0.547	0.369	1.13	0.046	0.028		B_2_1_96	4	121	0.084	15.2	0.009	0.091	13.5	0.027	0.398	0.35	0.762	0.058	0.023		C_2_1_96	4	147	0.084	20.7	0.009	0.085	21.1	0.005	0.152	0.26	0.365	0.037	0.027		D_2_1_96	4	167	0.084	51.1
A_2_1_21D	21	159	1.66	9.91	0.017	0.336	58.7	0.005	0.774	0.606	1.64	0.064	0.072		B_2_1_21D	21	183	0.084	16.1	0.009	0.207	48	0.006	0.735	0.636	1.51	0.079	0.045		C_2_1_21D	21	250	0.084	37.3	0.009	0.05	42.6	0.005	0.218	0.356	0.53	0.028	0.035		D_2_1_21D	21	121	6.55	74
A_2_2_1	0.042	150	0.084	1.39	0.009	0.03	0.762	0.005	0.061	0.045	0.224	0.002	0.027		B_2_2_1	0.042	80.3	0.084	2.88	0.009	0.021	0.432	0.007	0.053	0.055	0.088	0.009	0.022		C_2_2_1	0.042	177	0.205	7.86	0.009	0.033	3.08	0.005	0.06	0.068	0.141	0.009	0.034		D_2_2_1	0.042	98.5	0.084	3.96
A_2_2_2	0.083	286	0.084	1.8	0.009	0.038	1.88	0.005	0.18	0.064	0.368	0.002	0.112		B_2_2_2	0.083	221	0.084	3.94	0.009	0.008	1.2	0.005	0.174	0.088	0.1	0.002	0.135		C_2_2_2	0.083	177	0.084	6.37	0.009	0.038	4.38	0.005	0.095	0.117	0.176	0.002	0.044		D_2_2_2	0.083	223	0.084	22.5
A_2_2_4	0.167	103	0.084	6.18	0.009	0.12	3.39	0.014	0.192	0.112	0.56	0.004	0.03		B_2_2_4	0.167	707	0.084	4.29	0.009	0.008	1.49	0.005	0.305	0.249	0.268	0.002	0.154		C_2_2_4	0.167	112	0.084	7.21	0.009	0.044	5.89	0.005	0.083	0.127	0.214	0.01	0.018		D_2_2_4	0.167	90.6	0.084	12
A_2_2_8	0.333	102	0.084	7.4	0.009	0.142	4.88	0.027	0.247	0.173	0.705	0.011	0.033		B_2_2_8	0.333	169	0.084	18.5	0.009	0.059	2.14	0.013	0.183	0.177	0.27	0.021	0.029		C_2_2_8	0.333	104	0.084	14.8	0.009	0.038	7.41	0.005	0.117	0.169	0.248	0.016	0.034		D_2_2_8	0.333	53	0.084	6.38
A_2_2_24	1	79.3	0.459	3.72	0.009	0.175	7.7	0.017	0.305	0.198	0.842	0.011	0.022		B_2_2_24	1	142	0.084	12.7	0.009	0.088	4.74	0.018	0.254	0.244	0.435	0.037	0.016		C_2_2_24	1	94	0.084	11.2	0.009	0.057	10.8	0.005	0.122	0.21	0.291	0.026	0.018		D_2_2_24	1	200	0.084	97.8
A_2_2_48	2	167	0.084	1.11	0.019	0.21	12.3	0.005	0.396	0.264	0.956	0.024	0.032		B_2_2_48	2	156	0.084	18.3	0.009	0.092	7.87	0.025	0.311	0.291	0.577	0.047	0.023		C_2_2_48	2	141	0.084	21	0.009	0.07	14.7	0.005	0.144	0.245	0.327	0.036	0.021		D_2_2_48	2	96.8	0.084	33.1
A_2_2_96	4	163	0.084	24.7	0.02	0.216	17.4	0.018	0.439	0.31	1.06	0.031	0.028		B_2_2_96	4	168	0.084	17.9	0.009	0.106	13.2	0.032	0.403	0.345	0.75	0.058	0.022		C_2_2_96	4	115.2	0.084	10.6	0.009	0.061	20.2	0.005	0.151	0.268	0.412	0.039	0.019		D_2_2_96	4	141	0.084	45.7
A_2_2_30D	30	252	0.084	28	0.009	0.374	72.1	0.005	0.72	0.6	1.62	0.023	0.084		B_2_2_30D	30	244	0.084	24.1	0.009	0.27	71	0.008	0.815	0.725	1.765	0.053	0.089		C_2_2_30D	30	237	0.687	35	0.009	0.008	58.1	0.005	1.66	0.425	0.741	0.02	0.069		D_2_2_30D	30	157	12.6	26.1
A_2_2_100D	100	245	1.08	36.8	0.009	0.405	75.5	0.072	1.06	0.881	2.1	0.034	0.066		B_2_2_100D	100	355	0.084	32.9	0.009	0.008	259	0.005	0.976	1.12	2.87	0.005	0.327		C_2_2_100D	100	278	0.084	42	0.009	0.008	104	0.005	0.355	0.566	0.971	0.041	0.002		D_2_2_100D	100	179	8.2	105
A_2_2_600D	600	324	44.8	48.9	0.122	0.951	226	0.005	1.24	1.16	3.28	0.013	0.281		B_2_2_600D	600	513	18.6	45.9	0.198	0.842	366	0.005	1.36	1.41	3.44	0.078	0.561		C_2_2_600D	600	347	21.5	67.5	0.085	0.311	156	0.005	0.36	0.652	1.1	0.029	0.226		D_2_2_600D	600	303	36.2	108
A_3_1_1	0.042	13.5	0.064	1.38	0.009	0.029	0.445	0.005	0.05	0.033	0.14	0.003	0.022		B_3_1_1	0.042	14.4	0.197	1.75	0.009	0.016	0.118	0.005	0.031	0.017	0.038	0.003	0.029		C_3_1_1	0.042	15.5	0.084	2.68	0.009	0.005	0.578	0.005	0.029	0.017	0.052	0.004	0.041		D_3_1_1	0.042	12.8	0.204	0.986
A_3_1_2	0.083	13.1	0.084	2.71	0.009	0.062	1.02	0.011	0.122	0.046	0.313	0.003	0.018		B_3_1_2	0.083	12.6	0.259	3.35	0.009	0.022	0.199	0.005	0.059	0.038	0.094	0.004	0.022		C_3_1_2	0.083	18.7	0.084	5.47	0.009	0.03	1.79	0.005	0.122	0.056	0.146	0.007	0.036		D_3_1_2	0.083	18.6	0.084	2.7
A_3_1_4	0.167	21.4	0.2	1.45	0.009	0.072	1.22	0.012	0.153	0.057	0.382	0.011	0.047		B_3_1_4	0.167	21.9	0.084	9.24	0.009	0.037	0.312	0.014	0.1	0.062	0.111	0.006	0.033		C_3_1_4	0.167	19.3	0.168	5.14	0.009	0.029	2.1	0.005	0.074	0.066	0.143	0.008	0.033		D_3_1_4	0.167	21.3	0.084	6.36
A_3_1_8	0.333	28.3	0.602	10.6	0.009	0.101	1.87	0.025	0.216	0.076	0.521	0.008	0.055		B_3_1_8	0.333	16	0.084	4.27	0.009	0.047	0.396	0.015	0.096	0.061	0.134	0.004	0.023		C_3_1_8	0.333	30.3	0.084	17	0.009	0.044	3.3	0.005	0.094	0.077	0.197	0.007	0.038		D_3_1_8	0.333	26.3	1.04	9.4
A_3_1_24	1	23.3	0.147	11.5	0.009	0.144	2.53	0.033	0.256	0.106	0.616	0.01	0.03		B_3_1_24	1	26.8	0.084	15.3	0.009	0.061	0.77	0.026	0.157	0.098	0.213	0.013	0.019		C_3_1_24	1	34.6	0.084	21	0.008	0.059	4.49	0.005	0.106	0.102	0.198	0.013	0.022		D_3_1_24	1	40.7	0.845	29.3
A_3_1_48	2	35.3	0.084	3.37	0.009	0.04	1.72	0.005	0.152	0.046	0.323	0.002	0.027		B_3_1_48	2	25.7	0.084	13.6	0.009	0.061	1.12	0.028	0.201	0.117	0.267	0.01	0.032		C_3_1_48	2	37.6	0.084	27	0.009	0.066	5.86	0.005	0.104	0.111	0.225	0.006	0.028		D_3_1_48	2	54.5	0.084	5.03
A_3_1_96	4	34.3	1.15	20.6	0.009	0.193	3.86	0.053	0.337	0.133	0.752	0.004	0.027		B_3_1_96	4	17.3	0.154	10.6	0.009	0.069	1.83	0.034	0.246	0.192	0.377	0.007	0.03		C_3_1_96	4	56	0.493	39	0.009	0.062	7.6	0.005	0.133	0.123	0.256	0.002	0.048		D_3_1_96	4	43	1.35	35.3
A_3_1_21D (missing)	21														B_3_1_21D	21	50.4	0.121	21	0.009	0.2	11.7	0.081	0.626	0.478	0.973	0.004	0.027		C_3_1_21D	21	54.8	0.331	31.2	0.009	0.096	8.28	0.005	0.172	0.22	0.375	0.002	0.024		D_3_1_21D	21	69.1	14.5	51.6
A_3_2_1	0.042	17.7	0.084	2.45	0.009	0.028	0.442	0.005	0.052	0.021	0.124	0.004	0.028		B_3_2_1 (missing)	0.042														C_3_2_1 (missing)	0.042														D_3_2_1	0.042	14.9	0.157	3.12
A_3_2_2	0.083	17.6	0.084	4.63	0.006	0.078	1.11	0.017	0.128	0.049	0.333	0.004	0.028		B_3_2_2	0.083	15.7	0.084	2.49	0.009	0.021	0.194	0.005	0.056	0.042	0.069	0.003	0.027		C_3_2_2	0.083	18.2	4.62	5.34	0.009	0.016	1.34	0.005	0.052	0.312	0.004	0.003	0.022		D_3_2_2	0.083	23	0.267	8.76
A_3_2_4	0.167	18.6	0.084	7.33	0.009	0.076	1.37	0.017	0.167	0.063	0.378	0.006	0.031		B_3_2_4	0.167	16.4	0.084	5.74	0.009	0.025	0.297	0.008	0.079	0.05	0.084	0.009	0.049		C_3_2_4	0.167	17.9	0.084	6.07	0.009	0.038	1.96	0.005	0.061	0.055	0.139	0.007	0.029		D_3_2_4	0.167	27.3	0.863	15.7
A_3_2_8	0.333	14	0.084	2.23	0.009	0.107	1.5	0.023	0.186	0.071	0.488	0.005	0.035		B_3_2_8	0.333	26.9	0.084	12.1	0.009	0.044	0.451	0.013	0.107	0.075	0.149	0.009	0.028		C_3_2_8	0.333	21.7	0.147	9.29	0.009	0.035	2.69	0.005	0.076	0.073	0.178	0.006	0.024		D_3_2_8	0.333	24.9	0.847	14.5
A_3_2_24	1	27.3	1.37	3.92	0.009	0.112	1.93	0.005	0.175	0.076	0.506	0.013	0.041		B_3_2_24	1	17	0.084	3.63	0.009	0.036	0.579	0.012	0.132	0.076	0.18	0.014	0.038		C_3_2_24	1	29.1	0.084	10.5	0.009	0.02	3.62	0.005	0.087	0.085	0.186	0.005	0.043		D_3_2_24	1	40.7	0.58	13.9
A_3_2_48	2	28.1	0.084	10.3	0.009	0.119	2.41	0.037	0.237	0.085	0.546	0.002	0.037		B_3_2_48	2	31.2	0.084	18.6	0.009	0.059	1.09	0.026	0.212	0.109	0.261	0.008	0.033		C_3_2_48	2	36.4	0.084	6.77	0.009	0.035	4.68	0.005	0.094	0.07	0.137	0.002	0.057		D_3_2_48	2	27.7	0.966	8.6
A_3_2_96	4	39.6	0.084	24.4	0.009	0.19	3.63	0.049	0.347	0.126	0.758	0.006	0.029		B_3_2_96	4	28.9	0.071	18.3	0.009	0.076	1.9	0.035	0.261	0.139	0.354	0.01	0.027		C_3_2_96	4	45.1	0.084	28.9	0.009	0.061	6.97	0.005	0.117	0.122	0.255	0.007	0.034		D_3_2_96	4	22	1.251	12.7
A_2_2_30D (missing)	30														B_2_2_30D	30	85.2	0.19	25	0.009	0.297	30	0.005	0.742	0.614	1.31	0.006	0.038		C_2_2_30D	30	71.8	0.084	38.2	0.009	0.111	10.1	0.005	0.197	0.256	0.439	0.004	0.034		D_2_2_30D	30	48.4	7.9	38.5
A_3_2_100D	100	163	1.04	35.3	0.009	0.612	70	0.007	0.906	0.779	2.03	0.002	0.07		B_3_2_100D	100	210	0.667	46.6	0.009	0.68	136	0.013	1.41	1.31	3.1	0.039	0.034		C_3_2_100D	100	101	0.517	39.2	0.009	0.199	19.6	0.005	0.279	0.384	0.668	0.007	0.027		D_3_2_100D	100	74.1	13.4	52.6
A_3_2_600D	600	278	45.4	70	0.061	1.02	125	0.005	1.28	1.31	3.57	0.007	0.175		B_3_2_600D	600	365	36.5	57.5	0.109	0.87	240	0.005	1.11	1.51	3.49	0.023	0.494		C_3_2_600D	600	178	18.2	76.4	0.024	0.296	31.3	0.005	0.398	0.628	1.08	0.014	0.117		D_3_2_600D	600	68.6	35.9	50.6
A_4_1_1	0.042	7.4	1.8	1.92	0.009	0.02	0.365	0.005	0.038	0.021	0.111	0.005	0.032		B_4_1_1	0.042	11.5	0.505	4.11	0.009	0.018	0.105	0.005	0.043	0.015	0.04	0.006	0.029		C_4_1_1	0.042	9.44	0.255	2.66	0.009	0.008	0.406	0.005	0.019	0.014	0.041	0.008	0.027		D_4_1_1	0.042	9.73	0.136	2.8
A_4_1_2	0.083	13.6	0.084	4.14	0.571	0.056	0.773	0.009	0.116	0.036	0.373	0.002	0.027		B_4_1_2	0.083	9.93	0.084	4.03	0.009	0.023	0.087	0.007	0.056	0.024	0.056	0.006	0.034		C_4_1_2	0.083	19.7	0.084	10.1	0.009	0.027	1.35	0.005	0.068	0.042	0.109	0.005	0.036		D_4_1_2	0.083	16	0.534	2.72
A_4_1_4	0.167	15.1	1.02	7.72	0.009	0.094	0.932	0.027	0.155	0.05	0.374	0.006	0.033		B_4_1_4	0.167	14.1	0.348	6.14	0.009	0.025	0.13	0.01	0.079	0.031	0.069	0.007	0.029		C_4_1_4	0.167	24.8	1.63	14.6	0.009	0.036	1.69	0.005	0.06	0.037	0.098	0.002	0.028		D_4_1_4	0.167	18.9	1.31	11.1
A_4_1_8	0.333	18.1	1.26	9.08	0.009	0.099	1.16	0.023	0.174	0.052	0.417	0.01	0.03		B_4_1_8	0.333	9.44	0.222	2.51	0.009	0.027	0.136	0.01	0.08	0.033	0.086	0.002	0.042		C_4_1_8	0.333	30.9	0.154	18.8	0.009	0.031	2.35	0.005	0.077	0.055	0.181	0.009	0.031		D_4_1_8	0.333	36.2	1.25	13.5
A_4_1_24	1	18.5	1.11	7.13	0.009	0.1	0.833	0.029	0.201	0.048	0.464	0.01	0.03		B_4_1_24	1	24.1	0.084	7.94	0.009	0.018	0.21	0.005	0.068	0.02	0.038	0.002	0.022		C_4_1_24	1	33.9	0.084	13.8	0.008	0.008	2.43	0.005	0.069	0.039	0.127	0.014	0.022		D_4_1_24 (no spike)	1
A_4_1_48	2	33.8	0.084	6.6	0.009	0.074	0.612	0.005	0.122	0.024	0.28	0.002	0.043		B_4_1_48	2	20.1	1.15	11.5	0.009	0.051	0.307	0.017	0.142	0.048	0.149	0.008	0.061		C_4_1_48	2	49.2	1.87	10.7	0.009	0.008	2.46	0.005	0.101	0.091	0.202	0.03	0.036		D_4_1_48	2	37.8	0.859	7.44
A_4_1_96	4	28.5	2.92	20.8	0.009	0.159	0.488	0.052	0.277	0.058	0.56	0.003	0.032		B_4_1_96	4	20.1	0.337	13.6	0.009	0.058	0.452	0.029	0.188	0.063	0.217	0.004	0.028		C_4_1_96	4	37.8	2.58	18.9	0.009	0.042	4.36	0.005	0.1	0.081	0.229	0.002	0.04		D_4_1_96	4	23.7	2.25	15.1
A_4_1_21D (missing)	21														B_4_1_21D	21	44.2	1.48	25	0.009	0.172	11.8	0.069	0.55	0.332	0.767	0.005	0.032		C_4_1_21D	21	43	0.359	31.1	0.009	0.076	1.58	0.005	0.004	0.004	0.004				D_4_1_21D	21	39.7	11.5	29.8
A_4_2_1	0.042	10.1	0.384	3.9	0.009	0.044	0.47	0.01	0.069	0.026	0.173	0.005	0.035		B_4_2_1	0.042	8.58	0.227	2.72	0.009	0.017	0.076	0.008	0.046	0.015	0.04	0.005	0.033		C_4_2_1	0.042	9.15	0.65	3.51	0.009	0.011	0.821	0.005	0.029	0.023	0.072	0.002	0.036		D_4_2_1	0.042	12.5	0.212	4.5
A_4_2_2	0.083	16.94	0.577	8.28	0.009	0.081	0.83	0.02	0.117	0.033	0.258	0.003	0.032		B_4_2_2	0.083	9.41	0.084	3.69	0.009	0.023	0.101	0.007	0.051	0.02	0.062	0.006	0.033		C_4_2_2	0.083	14.6	1.22	8.44	0.009	0.024	1.39	0.005	0.058	0.037	0.542	0.002	0.035		D_4_2_2	0.083	15.4	0.245	7.2
A_4_2_4	0.167	20	1.78	5.03	0.009	0.057	0.782	0.014	0.145	0.04	0.365	0.007	0.043		B_4_2_4	0.167	11.8	0.084	3.33	0.009	0.022	0.117	0.008	0.061	0.027	0.076	0.002	0.028		C_4_2_4	0.167	22.2	0.958	10.6	0.009	0.02	1.59	0.005	0.056	0.04	0.12	0.01	0.022		D_4_2_4	0.167	22.6	0.592	3.35
A_4_2_8	0.333	11	0.891	3.95	0.009	0.091	0.77	0.03	0.183	0.045	0.431	0.005	0.031		B_4_2_8	0.333	14.9	0.084	4.23	0.009	0.027	0.156	0.01	0.101	0.037	0.093	0.002	0.043		C_4_2_8	0.333	17.8	3.41	8.44	0.009	0.023	1.65	0.005	0.055	0.042	0.115	0.002	0.018		D_4_2_8	0.333	22.1	1.4	13.2
A_4_2_24	1	14.2	0.657	4.33	0.009	0.075	0.502	0.025	0.146	0.032	0.37	0.002	0.024		B_4_2_24	1	22	0.084	8.9	0.009	0.029	0.202	0.013	0.104	0.035	0.109	0.007	0.032		C_4_2_24	1	30	0.084	18.7	0.008	0.031	2.54	0.005	0.082	0.06	0.178	0.004	0.031		D_4_2_24	1	24.2	0.683	18.4
A_4_2_48	2	18.4	0.146	8.68	0.009	0.106	0.373	0.045	0.223	0.042	0.453	0.004	0.037		B_4_2_48	2	18.2	0.921	10.7	0.009	0.046	0.242	0.022	0.147	0.046	0.158	0.003	0.034		C_4_2_48	2	47.5	0.084	17.1	0.009	0.008	2.25	0.005	0.078	0.05	0.099	0.002	0.051		D_4_2_48	2	41.7	1.18	4.77
A_4_2_96	4	19.1	0.387	10.4	0.009	0.133	0.223	0.046	0.248	0.043	0.517	0.002	0.034		B_4_2_96	4	21.8	0.453	11.4	0.009	0.051	0.438	0.028	0.191	0.254	0.207	0.004	0.031		C_4_2_96	4	40.5	20.3	25.7	0.009	0.047	3.91	0.005	0.099	0.078	0.229	0.002	0.03		D_4_2_96	4	25.9	0.926	8.66
A_4_2_30D	30	49.3	0.306	30.1	0.009	0.264	3.29	0.094	0.581	0.231	1.08	0.002	0.03		B_4_2_30D	30	41.9		21.2	0.009	0.171	12.1	0.077	0.613	0.4	0.85	0.005	0.027		C_4_2_30D	30	42.2	0.084	28.6	0.009	0.075	1.68	0.005	0.174	0.189	0.354	0.002	0.025		D_4_2_30D	30	39.8	8.58	28.2
A_4_2_100D	100	152	0.725	37.2	0.009	0.705	66.9	0.011	0.929	0.756	2.08	0.002	0.052		B_4_2_100D	100	197	0.397	58.5	0.009	0.008	104.5	0.005	1.395	1.29	3.03	0.002	0.091		C_4_2_100D	100	91.8	0.093	39.9	0.009	0.188	11	0.005	0.279	0.354	0.618	0.008	0.027		D_4_2_100D	100	68.8	13.3	50.5
A_4_2_600D	600	333	25.8	72.4	0.076	0.95	175	0.005	1.31	1.4	3.77	0.019	0.244		B_4_2_600D	600	230	55.1	50.6	0.093	0.919	197	0.005	1.29	1.28	3.65	0.016	0.249		C_4_2_600D	600	174	32.3	61.9	0.009	0.378	26.7	0.005	0.452	0.723	1.31	0.011	0.089		D_4_2_600D	600	114	48.3	82.6
A_5_1_1	0.042	7.41	0.416	1.9	0.009	0.036	0.366	0.013	0.07	0.021	0.168	0.007	0.042		B_5_1_1	0.042	7.1	1.3	1.55	0.009	0.01	0.053	0.005	0.038	0.011	0.035	0.006	0.035		C_5_1_1	0.042	8.62	0.741	3.26	0.009	0.017	0.422	0.005	0.031	0.02	0.077	0.004	0.04		D_5_1_1	0.042	15.1	0.292	4.05
A_5_1_2	0.083	8.26	0.35	2.78	0.009	0.06	0.482	0.017	0.112	0.031	0.261	0.003	0.033		B_5_1_2	0.083	8.01	0.765	2.25	0.009	0.017	0.073	0.008	0.037	0.015	0.04	0.005	0.025		C_5_1_2 (no spike)	0.083														D_5_1_2	0.083	15.9	0.689	8.89
A_5_1_4	0.167	10.2	0.52	2.73	0.009	0.06	0.57	0.02	0.11	0.033	0.291	0.006	0.033		B_5_1_4	0.167	13.5	9.42	7.8	0.009	0.033	0.134	0.01	0.085	0.032	0.102	0.006	0.042		C_5_1_4	0.167	24	0.344	15.7	0.009	0.034	1.86	0.005	0.065	0.048	0.14	0.006	0.03		D_5_1_4	0.167	14.4	0.649	4.8
A_5_1_8	0.333	12.2	0.668	3.39	0.009	0.076	0.618	0.025	0.153	0.035	0.402	0.005	0.027		B_5_1_8	0.333	10.6	0.27	1.62	0.009	0.008	0.096	0.005	0.058	0.022	0.056	0.005	0.03		C_5_1_8	0.333	36.5	1.43	25.7	0.009	0.076	2.71	0.005	0.124	0.086	0.274	0.006	0.04		D_5_1_8	0.333	19.8	0.758	7.8
A_5_1_24	1	19.1	1.34	5.38	0.009	0.075	0.46	0.021	0.164	0.161	0.451	0.002	0.042		B_5_1_24	1	18.1	0.387	10.7	0.009	0.036	0.109	0.015	0.115	0.032	0.11	0.007	0.03		C_5_1_24	1	26.7	0.583	19.3	0.009	0.041	2.43	0.005	0.076	0.055	0.15	0.005	0.03		D_5_1_24	1	26.2	3.71	18.3
A_5_1_48	2	20.5	0.443	2.98	0.009	0.059	0.283	0.02	0.155	0.033	0.312	0.002	0.038		B_5_1_48	2	15.3	0.566	8.24	0.009	0.046	0.162	0.021	0.126	0.037	0.148	0.008	0.03		C_5_1_48	2	35.7	0.084	12.8	0.009	0.034	2.21	0.005	0.088	0.056	0.132	0.002	0.04		D_5_1_48	2	15.4	0.344	3.1
A_5_1_96	4	30.5	0.431	18.8	0.009	0.161	0.211	0.053	0.276	0.041	0.539	0.007	0.029		B_5_1_96	4	19.6	2.02	14.8	0.009	0.06	0.267	0.031	0.183	0.048	0.205	0.005	0.031		C_5_1_96	4	31.1	1.75	17.2	0.009	0.041	2.85	0.005	0.082	0.057	0.168	0.002	0.029		D_5_1_96	4	31.3	2.49	24.5
A_5_1_21D	21	39.8	3.23	26.2	0.009	0.217	1.25	0.089	0.472	0.119	0.879	0.005	0.032		B_5_1_21D	21	35.8	1.48	19.8	0.009	0.127	6.51	0.06	0.5	0.249	0.669	0.005	0.035		C_5_1_21D	21	49.4	1.07	27.3	0.009	0.079	1.5	0.005	0.151	0.157	0.339	0.002	0.035		D_5_1_21D	21	59	17.5	47.5
A_5_2_1	0.042	9.34	0.87	3.3	0.009	0.039	0.375	0.015	0.082	0.025	0.174	0.006	0.036		B_5_2_1	0.042	7.76	0.856	1.72	0.009	0.009	0.068	0.005	0.021	0.008	0.021	0.005	0.034		C_5_2_1	0.042	5.79	0.678	3.72	0.009	0.006	0.438	0.005	0.027	0.016	0.047	0.004	0.028		D_5_2_1	0.042	7.67	0.084	1.77
A_5_2_2	0.083	11.8	1.33	5.34	0.009	0.067	0.625	0.016	0.12	0.032	0.257	0.005	0.03		B_5_2_2	0.083	12.43	0.461	5.68	0.009	0.018	0.108	0.007	0.063	0.03	0.069	0.006	0.033		C_5_2_2	0.083	15.7	0.692	9.56	0.009	0.037	1.21	0.005	0.061	0.044	0.131	0.009	0.035		D_5_2_2	0.083	16.1	0.259	7.46
A_5_2_4	0.167	14.5	0.971	5.99	0.009	0.073	0.612	0.02	0.139	0.032	0.312	0.005	0.031		B_5_2_4	0.167	12.63	0.148	6.2	0.009	0.033	0.102	0.014	0.064	0.026	0.062	0.007	0.027		C_5_2_4	0.167	36.7	1.47	16.5	0.009	0.008	1.83	0.005	0.073	0.039	0.06	0.002	0.037		D_5_2_4	0.167	15.6	1.2	6.87
A_5_2_8	0.333	8.76	0.512	1.79	0.009	0.066	0.52	0.018	0.127	0.028	0.307	0.006	0.024		B_5_2_8	0.333	16.64	0.264	8.16	0.009	0.032	0.112	0.012	0.079	0.034	0.088	0.006	0.03		C_5_2_8 (no spike)	0.333														D_5_2_8	0.333	22.5	2.1	14.8
A_5_2_24	1	15.7	0.571	2.42	0.009	0.069	0.481	0.033	0.194	0.028	0.379	0.002	0.029		B_5_2_24	1	18	0.189	9.49	0.009	0.036	0.153	0.017	0.114	0.04	0.112	0.006	0.033		C_5_2_24	1	40.1	0.084	24	0.009	0.057	2.76	0.005	0.089	0.069	0.271	0.002	0.044		D_5_2_24	1	21.1	2.4	12.8
A_5_2_48	2	37.4	0.67	7.96	0.009	0.083	0.358	0.028	0.188	0.04	0.359	0.002	0.03		B_5_2_48	2	15.7	1.05	8.07	0.009	0.049	0.173	0.021	0.367	0.038	0.14	0.009	0.025		C_5_2_48	2	37.8	1.24	24.5	0.009	0.05	2.83	0.005	0.091	0.06	0.194	0.006	0.027		D_5_2_48	2	21.4	0.481	9.8
A_5_2_96	4	30.6	0.401	6.5	0.009	0.079	0.197	0.005	0.14	0.018	0.26	0.002	0.036		B_5_2_96	4	16.6	0.33	10.3	0.009	0.059	0.258	0.03	0.162	0.051	0.194	0.006	0.033		C_5_2_96	4	48.2	1.52	26.5	0.009	0.045	3.79	0.005	0.091	0.062	0.198	0.002	0.031		D_5_2_96	4	29.6	3.07	23.9
A_5_2_30D	30	47.7	0.084	29.8	0.009	0.258	2.33	0.097	0.552	0.184	0.996	0.003	0.03		B_5_2_30D	30	56.3	0.084	26.6	0.009	0.201	19.1	0.051	0.647	0.427	0.898	0.006	0.033		C_5_2_30D	30	71.8	0.084	47	0.009	0.114	2.3	0.005	0.216	0.218	0.421	0.002	0.037		D_5_2_30D	30	40	10.5	31.2
A_5_2_100D	100	164	3.34	48.6	0.009	0.628	60.4	0.011	1.02	0.786	2.1	0.003	0.05		B_5_2_100D	100	195	0.084	38.8	0.009	0.578	123	0.005	1.07	1.04	2.35	0.025	0.033		C_5_2_100D	100	100	0.116	38.9	0.009	0.223	16.5	0.005	0.314	0.389	0.72	0.006	0.029		D_5_2_100D	100	79.9	19.9	59.8
A_5_2_600D	600	270	29	58.7	0.055	0.609	129	0.005	1.07	1.15	2.67	0.015	0.181		B_5_2_600D	600	198	61	41.9	0.055	0.697	147	0.005	1.14	1.12	3.07	0.021	0.182		C_5_2_600D	600	141	32	52.7	0.016	0.352	32.3	0.005	0.42	0.561	1.24	0.002	0.079		D_5_2_600D	600	55	45.3	51.3
[truncated: 65 more columns]

## Sheet: WetChem_Shale A
Shale A pH	Time (Days)
sample	2010-07-02	2010-07-02	2010-07-02	2010-07-02	2010-07-02	2010-07-02	2010-07-03	2010-07-05	2010-07-23	2010-07-31	2010-10-10	2012-02-28
	0.01	0.0416667	0.0833333	0.166667	0.333333	1	2	4	21	30	100	600
2_1	2	2.01	2.07	2.31	2.16	2.23	2.18	2.09	2.14
2_2	2	2.04	2.07	2.31	2.15	2.3	2.12	2.12		2.17	2.14	2
3_1	3	3.08	3.18	3.4	3.5	3.72	3.69	3.9	3.22
3_2	3	3.2	3.12	3.4	3.35	3.73	3.84	3.93		3.01	2.57	2.25
4_1	4	4.12	4.06	4.24	4.21	4.6	4.61	4.63	4.1
4_2	4	3.99	4.14	4.29	4.29	4.69	4.63	4.74		3.74	2.57	2.16
5_1	5	4.56	4.53	4.56	4.59	4.92	4.77	4.74	4.24
5_2	5	4.61	4.58	4.64	4.62	5.01	4.82	4.87		3.87	2.59	2.24
Blank	2	2.01	2.07	2.06	2.04	2	2.06	1.88		2.1	2.04	1.95
Shale A Temp
	0.01	0.0416667	0.0833333	0.166667	0.333333	1	2	4	21	30	100	600
2_1		19.7	20	20.5	21.1	19.5	19.7	18.9	19.1
2_2		19.7	19.9	20.4	21	19.4	19.5	18.6		20.2	26.9	23
3_1		19.8	20.1	20.6	21.3	19.7	20	19.2	19.6
3_2		19.6	19.9	20.4	21	19.3	19.5	18.6		20.5	27	23
4_1		19.8	20	20.7	21.4	19.7	20.2	19.1	20.1
4_2		19.6	19.8	20.4	21.1	19.3	19.6	18.6		20.9	27.2	23
5_1		19.6	19.8	20.5	21.3	19.5	20	18.8	20.1
5_2		19.5	19.7	20.3	21.1	19.1	19.4	18.4		20.9	27.1	23
Blank		19.2	19.5	20.2	20.9	19	19.2	18.1		19.8	27.5	23
Air	19.2	19.3	19.9	20.5	20.9	19.4	19.2	18.2	18.6	20.7	25.9	23
Shale A DO
	0.01	0.0416667	0.0833333	0.166667	0.333333	1	2	4	21	30	100	600
2_1		8.2	8.4	8.5	8.3	8.3	8.5	8.7	8.4
2_2		8.3	8.6	8.5	8.3	8.5	8.6	8.9		8.4	7.7
3_1		8.2	8.5	8.5	8.3	8.4	8.5	9	8.6
3_2		8.3	8.5	8.5	8.2	8.4	8.6	8.8		8.2	7.7
4_1		8	8.4	8.5	8.2	8.5	8.7	8.8	8.5
4_2		8.1	8.4	8.4	8.2	8.4	8.6	9		8.6	7.6
5_1		7.8	8.2	8.4	8.4	8.5	8.8	9	8.6
5_2		7.8	8.3	8.4	8.3	8.6	8.7	8.9		8.5	7.6
Blank		7.4	8.1	8.4	8.5	8.5	8.7	9.1		8.5	7.8
Shale A ORP
	0.01	0.0416667	0.0833333	0.166667	0.333333	1	2	4	21	30	100	600
2_1		464	463	457	455	443	433	423	608
2_2		473	467	462	459	448	440	428		601	621	639
3_1		449	446	426	416	393	370	357	493
3_2		450	444	428	415	390	370	357		532	601	626
4_1		394	388	367	361	344	328	333	332
4_2		390	382	365	353	335	329	344		386	577	627
5_1		333	339	318	326	300	299	322	306
5_2		334	345	321	335	330	308	318		378	567	632
Blank		451	512	471	441	449	476	483		454	525	569
*Blank is Week 4 Blank, measurements taken at same time as Shale A

## Sheet: WetChem_Shale B
Shale B pH	Time (Days)
sample	2010-07-02	2010-07-02	2010-07-02	2010-07-02	2010-07-02	2010-07-02	2010-07-03	2010-07-05	2010-07-23	2010-07-31	2010-10-10	2012-02-28
	0.01	0.0416667	0.0833333	0.166667	0.333333	1	2	4	21	30	100	600
2_1	2	2.04	2.1	2.2	2.14	2.07	2.13	2.1	2.14
2_2	2	2.04	2.13	2.11	2.06	2.08	2.05	2.14		2.13	2.19	1.94
3_1	3	3.14	3.17	3.27	3.3	3.58	3.64	3.73	3.04
3_2	3	3.14	3.15	3.26	3.3	3.5	3.58	3.69		2.79	2.48	2.16
4_1	4	4.22	4.28	4.35	4.45	4.67	4.5	4.61	3.5
4_2	4	4.24	4.27	4.36	4.4	4.61	4.58	4.55		3.28	2.55	2.19
5_1	5	5.11	4.95	5	4.77	4.9	4.9	4.8	3.89
5_2	5	5.01	4.96	4.87	4.78	4.85	4.75	4.79		3.42	2.67	2.18
Blank	2	2.01	2.07	2.06	2.04	2	2.06	1.88		2.1	2.04	1.95
Shale B Temp
	0.01	0.0416667	0.0833333	0.166667	0.333333	1	2	4	21	30	100	600
2_1		21.3	20.7	21.3	21.7	20.8	20.3	19.6	20.4
2_2		21.2	20.6	21.2	21.4	20.5	19.7	19.3		20.2	23.7	23
3_1		21.5	20.8	21.5	21.9	21	19.9	19.7	20.4
3_2		21.2	20.6	21.2	21.5	20.7	19.6	19.4		20.4	23.2	23
4_1		21.4	20.6	21.4	21.6	20.3	19.6	20.6	20.2
4_2		21.1	20.5	21.1	21.6	20.3	19.4	20.4		20.4	23.6	23
5_1		21	20.4	21	21.2	19.8	19.4	20.3	19.7
5_2		21	20.4	21	21.1	19.8	19.3	19.7		20.4	23.5	23
Air	20.2	20.3	20.3	20.5	21.1	19.8	19.9	19.6	18.2	20.1	22.4	23
Shale B DO
	0.01	0.0416667	0.0833333	0.166667	0.333333	1	2	4	21	30	100	600
2_1		8.1	8.2	8.3	8.1	8.4	8.7	8.8	8.3
2_2		8.1	8.2	8.3	8.1	8.4	8.7	8.9		8.4	7.4
3_1		8.1	8.2	8.3	8.2	8.4	8.6	8.9	8.4
3_2		8.1	8.2	8.3	8.3	8.4	8.6	8.8		8.4	7.6
4_1		7.9	8.3	8.3	8.2	8.6	8.6	8.8	8.6
4_2		8	8.3	8.2	8.2	8.6	8.7	8.8		8.6	7.8
5_1		7.8	8.2	8.5	8.4	8.7	8.7	8.9	9
5_2		7.9	8.3	8.2	8.3	8.6	8.7	9		8.7	8.2
Blank		7.4	8.1	8.4	8.5	8.5	8.7	9.1		8.5	7.8
Shale B ORP
	0.01	0.0416667	0.0833333	0.166667	0.333333	1	2	4	21	30	100	600
2_1		462	463	451	451	441	434	423	440
2_2		461	463	454	451	443	434	424		593	571	633
3_1		451	427	429	424	387	396	365	569
3_2		452	431	440	429	403	394	365		566	575	623
4_1		406	381	378	362	348	352	330	390
4_2		410	388	379	370	350	345	332		425	535	625
5_1		339	331	349	330	332	313	298	335
5_2		342	329	338	337	335	321	306		396	455	627
Blank		451	512	471	441	449	476	483		454	525	569
*Blank is Week 4 Blank, measurements taken at same time as Shale A, different times to Shale B

## Sheet: WetChem_Shale C
Shale C pH	Time (Days)
sample	2010-07-02	2010-07-02	2010-07-02	2010-07-02	2010-07-02	2010-07-02	2010-07-03	2010-07-05	2010-07-23	2010-07-31	2010-10-10	2012-02-28
	0.01	0.0416667	0.0833333	0.166667	0.333333	1	2	4	21	30	100	600
2_1	2	2.04	2.04	2.09	2.04	2.03	2.07	2.06	2.14
2_2	2	2.04	2.04	2.1	2.07	2.09	2.14	2.09		2.12	2.14	1.96
3_1	3	3.13	3.1	3.06	3.04	3.24	3.19	3.22	3.08
3_2	3	3.08	3.05	3.14	3.11	3.16	3.23	3.21		2.94	2.69	2.31
4_1	4	4.04	3.88	3.88	3.82	3.83	3.79	3.74	3.3
4_2	4	4.03	3.92	3.92	3.84	3.82	3.76	3.79		3.18	2.8	2.4
5_1	5	4.33	4.12	4.12	3.9	3.97	3.93	3.85	3.44
5_2	5	4.39	4.07	4.07	3.96	3.98	3.81	3.86		3.2	2.7	2.33
Blank	2	2.01	2.07	2.06	2.04	2	2.06	1.96		2.1	2.04	1.95
Shale C Temp
	0.01	0.0416667	0.0833333	0.166667	0.333333	1	2	4	21	30	100	600
2_1		21.4	21	21.4	21.6	20.3	19.8	23.2	20
2_2		21	20.9	21	21.1	20.1	19.5	22		24	25.6	23
3_1		21.4	20.9	21.4	21.6	20.4	19.8	23.7	20.3
3_2		21.1	20.8	21.1	21	20.1	19.5	22.2		24.4	25.8	23
4_1		21.1	20.8	21.1	21.2	20.6	19.7	23.1	20.4
4_2		21	20.7	21	20.9	20.5	19.6	21.9		24.2	25.9	23
5_1		20.9	20.6	20.9	20.8	20.1	19.3	22.3	20.4
5_2		20.9	20.7	20.9	20.7	20.4	19.4	21.4		23.8	25.5	23
Air	20.3	20.8	21	21	20.9	20	19.5	19.8	19.6	22.5	23.9	23
Shale C DO
	0.01	0.0416667	0.0833333	0.166667	0.333333	1	2	4	21	30	100	600
2_1		8.5	8.6	8.6	8.5	8.7	8.9	8.1	8.3
2_2		8.5	8.6	8.5	8.6	8.7	8.9	8.1		7.8	7.6
3_1		8.5	8.5	8.7	8.7	8.6	8.9	8.1	8.4
3_2		8.5	8.5	8.6	8.7	8.7	8.9	8.1		7.8	7.6
4_1		8.6	8.5	8.7	8.6	8.8	9.3	8.1	8.5
4_2		8.6	8.6	8.7	8.7	8.6	9.1	8.2		7.8	7.6
5_1		8.5	8.6	8.7	8.7	8.7	9.1	8.7	8.6
5_2		8.7	8.5	8.7	8.7	8.7	9.2	8.4		7.9	7.6
Blank		7.4	8.1	8.4	8.5	8.5	8.7	9.1		8.5	7.8
Shale C ORP
	0.01	0.0416667	0.0833333	0.166667	0.333333	1	2	4	21	30	100	600
2_1		471	466	461	457	445	436	428	489
2_2		473	467	462	458	444	436	427		487	509	627
3_1		449	441	431	419	403	381	373	482
3_2		459	446	432	423	403	385	374		491	532	588
4_1		408	398	390	382	361	347	350	476
4_2		410	399	390	379	361	347	350		490	514	614
5_1		380	372	363	358	340	342	328	473
5_2		380	374	369	363	349	331	337		483	534	610
Blank		451	512	471	441	449	476	483		454	525	569
*Blank is Week 4 Blank, measurements taken at same time as Shale A, different times to Shale C

## Sheet: WetChem_Shale D
Shale D pH	Time (Days)
sample	2010-07-02	2010-07-02	2010-07-02	2010-07-02	2010-07-02	2010-07-02	2010-07-03	2010-07-05	2010-07-23	2010-07-31	2010-10-10	2012-02-28
	0.01	0.0416667	0.0833333	0.166667	0.333333	1	2	4	21	30	100	600
2_1	2	2	2	2.07	2.14	2.37	2.65	3.04	3.84
2_2	2	1.96	2	2.15	2.14	2.41	2.79	3.19		4.36	3.64	2.27
3_1	3	2.99	3.25	3.38	3.79	5.26	6.47	6.76	7.28
3_2	3	3.06	3.3	3.52	3.87	5.28	6.3	6.71		7.26	7.26	3.67
4_1	4	4.54	4.76	5.03	5.75	6.44	6.96	7.01	7.5
4_2	4	4.52	4.52	5.02	5.43	6.3	6.78	6.89		7.28	7.3	4.31
5_1	5	5.62	5.75	5.91	5.97	6.58	7.01	7.06	7.31
5_2	5	5.8	5.72	5.94	5.98	6.48	6.95	6.98		7.37	7.36	4.33
Blank	2	1.89	2.26	1.9	1.9	1.95	2.11	2.04		2.04	2.07	1.95
Shale D Temp
	0.01	0.0416667	0.0833333	0.166667	0.333333	1	2	4	21	30	100	600
2_1		19.7	19.9	20.5	21.2	19.7	20	19.8	21.3
2_2		19.6	19.8	20.4	21	19.5	19.9	19.7		21.6	28	23
3_1		19.8	20.1	20.6	21.4	19.9	20.4	20.2	21.1
3_2		19.6	19.8	20.3	21.1	19.6	20.4	20.1		21.8	28.3	23
4_1		19.8	20.1	20.7	21.5	20.1	20.4	20.4	20.8
4_2		19.7	19.8	20.3	21.1	19.6	20.4	20.3		21.8	28.1	23
5_1		19.8	20	20.5	21.3	19.9	20	20	20.3
5_2		19.6	19.8	20.3	21	19.5	19.9	19.9		21.3	28.2	23
Blank		19.5	19.6	20.1	21	19.4	19.4	19.1		19.8	28.7	23
Air	19.3	19.8	20	20.7	21.4	19.9	19.7	19.2	20.2	18.9	22.4	23
Shale D DO
	0.01	0.0416667	0.0833333	0.166667	0.333333	1	2	4	21	30	100	600
2_1		8.4	8.4	8.4	8.3	8.4	8.6	8.6	8.4
2_2		8.5	8.4	8.4	8.4	8.5	8.3	8.6		8.5	7.4
3_1		8.3	8.4	8.4	8.4	8.4	8.8	8.5	8.3
3_2		8.4	8.4	8.4	8.4	8.2	8.5	8.6		8.4	7.8
4_1		8.3	8.4	8.4	8.4	8.4	8.5	8.4	8.3
4_2		8.3	8.4	8.4	8.4	8.5	8.4	8.5		8.3	7.4
5_1		8.2	8.4	8.1	8.3	8.3	8.4	8.4	8.4
5_2		8.2	8.4	8.4	8.4	8.5	8.5	8.6		8.4	7.4
Blank		8.2	8.3	8.1	8.3	8.6	8.4	8.4		8.6	7.5
Shale D ORP
	0.01	0.0416667	0.0833333	0.166667	0.333333	1	2	4	21	30	100	600
2_1		446	444	440	434	420	402	368	383
2_2		449	439	436	430	416	402	352		342	481	584
3_1		428	420	409	378	234	276	276	271
3_2		427	416	409	360	259	307	229		285	289	522
4_1		332	288	293	210	279	267	275	253
4_2		338	318	306	236	213	268	269		283	298	470
5_1		192	210	220	173	296	286	292	273
5_2		196	204	208	174	279	282	278		286	343	475
Blank		402	476	523	419	399	449	447		459	433	569
*Blank is Week 3 Blank, measurements taken at same time as Shale D

## Sheet: WetChem_Shale E
Shale E pH	Time (Days)
sample	2010-07-02	2010-07-02	2010-07-02	2010-07-02	2010-07-02	2010-07-02	2010-07-03	2010-07-05	2010-07-23	2010-07-31	2010-10-10	2012-02-28
	0.01	0.0416667	0.0833333	0.166667	0.333333	1	2	4	21	30	100	600
2_1	2	2.32	2.34	2.15	2.25	2.03	1.86	2.14	2.16
2_2	2	2.22	2.2	2.03	2.07	1.97	2.01	2.14		2.14	2.18	2.21
3_1	3	3.26	3.26	3.37	3.6	3.62	3.99	4.44	4.45
3_2	3	3.4	3.27	3.41	3.66	3.92	4.4	4.83		4.5	3.1	2.28
4_1	4	4.5	4.65	4.78	5.02	5.55	5.97	5.91	5.53
4_2	4	4.61	4.49	4.77	5	5.5	5.65	5.99		4.89	3.53	2.4
5_1	5	6.03	5.94	6.02	6.31	6.17	6.38	6.38	5.73
5_2	5	6	5.94	5.95	6.1	6.15	6.36	6.28		5.16	3.97	2.37
Blank	2	1.89	2.26	1.9	1.9	1.95	2.1	2.043		2	2.07	1.95
Shale E Temp
	0.01	0.0416667	0.0833333	0.166667	0.333333	1	2	4	21	30	100	600
2_1		20.9	21	21.3	21.2	20.8	20.9	21.5	21.5
2_2		20.7	20.9	21.1	20.8	20.7	20.7	21.3		22.1	25.4	23
3_1		20.8	21.1	21.4	21.5	20.8	21	21.7	21.4
3_2		20.7	20.9	21.1	21	20.6	20.6	21.3		22.5	25.3	23
4_1		20.7	20.9	21.3	21.4	20.8	20.7	21.5	21.5
4_2		20.6	20.8	21.1	20.9	20.6	20.5	21.3		22.7	25.1	23
5_1		20.6	20.7	21.1	21.2	20.7	20.5	21.3	21.4
5_2		20.6	20.7	21	20.8	20.6	20.3	21.2		22.5	24.8	23
Air		20.8	20.9	21.3	20.6	21.1	21	21.3	21	20	23.4	23
Shale E DO
	0.01	0.0416667	0.0833333	0.166667	0.333333	1	2	4	21	30	100	600
2_1		8.5	8.4	8.5	8.6	8.4	8.6	8.4	8.3
2_2		8.4	8.4	8.5	8.5	8.4	8.6	8.4		8.4	7.7
3_1		8.4	8.4	8.6	8.4	8.4	8.5	8.4	8.4
3_2		8.5	8.4	8.5	8.5	8.5	8.6	8.4		8.3	7.7
4_1		8.3	8.4	8.5	8.5	8.5	8.5	8.4	8.4
4_2		8.3	8.5	8.4	8.5	8.5	8.6	8.3		8.5	7.6
5_1		8.3	8.4	8.4	8.3	8.3	8.6	8.2	8.4
5_2		8.2	8.3	8.5	8.4	8.4	8.5	8.4		8.5	7.7
Blank		8.2	8.3	8.1	8.3	8.6	8.4	8.4		8.6	7.5
Shale E ORP
	0.01	0.0416667	0.0833333	0.166667	0.333333	1	2	4	21	30	100	600
2_1		460	445	446	444	437	426	420	401
2_2		455	462	445	447	437	427	420		431	432	604
3_1		439	442	432	423	401	369	340	331
3_2		452	442	439	432	390	333	330		328	476	605
4_1		356	362	366	357	287	324	346	361
4_2		387	374	379	371	284	292	345		339	497	578
5_1		284	261	326	326	305	293	309	371
5_2		267	275	315	315	298	273	327		371	340	583
Blank		402	476	523	419	399	449	447		459	433	569
*Blank is Week 3 Blank, measurements taken at same time as Shale D, different times to Shale E

## Sheet: WetChem_Shale F
Shale F pH	Time (Days)
sample	2010-07-02	2010-07-02	2010-07-02	2010-07-02	2010-07-02	2010-07-02	2010-07-03	2010-07-05	2010-07-23	2010-07-31	2010-10-10	2012-02-28
	0.01	0.0416667	0.0833333	0.166667	0.333333	1	2	4	21	30	100	600
2_1	2	2.21	2.4	2.4	2.5	2.5	2.3	2.3	2.33
2_2	2	2.32	2.4	2.5	2.6	2.5	2.2	2.17		2.32	2.3	2.06
3_1	3	3.35	3.5	3.6	3.7	4.2	4.5	4.76	4.38
3_2	3	3.5	3.5	3.7	3.9	4.6	5.1	5.08		4.73	3.12	2.3
4_1	4	4.5	4.7	5.1	5.6	6.4	6.7	6.46	5.97
4_2	4	4.4	4.8	5	5.5	6.3	6.4	6.56		5.21	3.34	2.3
5_1	5	6	5.9	6.3	6.2	6.6	6.6	6.58	5.54
5_2	5	5.9	5.9	6	6.3	6.5	6.5	6.28		5.15	3.4	2.28
Blank	2	2.3	2.3	2.3	2.3	2.3	2.3	2.1		2.13	2.14	1.95
Shale F Temp
	0.01	0.0416667	0.0833333	0.166667	0.333333	1	2	4	21	30	100	600
2_1		24.2	24.3	24.2	23.7	24	24.2	23.6	21.3
2_2		24	24.1	24	23.4	23.8	23.9	23.2		21.9	20.8	23
3_1		24.1	24.3	24.3	23.9	24	24.4	23.7	22.4
3_2		24	24.1	24	23.6	23.8	24.1	23.4		22.4	21.3	23
4_1		24	24.2	24.2	23.9	23.9	24.2	23.6	22.6
4_2		24	24	24	23.4	23.8	24.1	23.4		22.5	21.7	23
5_1		23.9	24	23.9	23.8	23.7	24.1	23.4	22.4
5_2		23.8	24	23.8	23.5	23.6	23.9	23.3		22.2	22	23
Air		24	24	23.6	22.8	23.8	24	22.7	21.3	20.2	19.9	23
Shale F DO
	0.01	0.0416667	0.0833333	0.166667	0.333333	1	2	4	21	30	100	600
2_1		8	8.1	8.1	8.2	8.2	8.3	8.2	8.4
2_2		8	8.1	7.9	8.2	8	8.2	8.3		8.5	8.1
3_1		8	8.1	8.1	8.3	8.2	8.3	8.2	8.3
3_2		8.2	8.1	8.2	8.2	8.2	8.3	8.3		8.5	8
4_1		8	8.1	8.3	8.3	8.2	8.3	8.3	8.3
4_2		8.2	8	8.2	8.3	8.1	8.3	8.3		8.5	7.9
5_1		7.8	8.6	8.7	8.6	8.1	8.3	8.4	8.4
5_2		8.1	8.1	8.3	8.2	8.2	8.4	8.3		8.3	8
Blank		8	7.9	8.2	8.7	8.2	8.6	8.4		9	8.1
Shale F ORP
	0.01	0.0416667	0.0833333	0.166667	0.333333	1	2	4	21	30	100	600
2_1		458	446	444	445	440	428	415	469
2_2		470	449	444	447	440	426	418		588	587	617
3_1		438	426	409	415	340	303	299	365
3_2		436	431	417	406	355	312	338		345	514	607
4_1		348	352	329	289	259	269	283	393
4_2		365	359	317	324	263	249	278		394	527	599
5_1		297	320	281	299	280	287	304	399
5_2		292	315	299	289	259	276	312		386	491	598
Blank		387	457	410	398	394	401	410		512	478	569
*Blank is Week 2 Blank, measurements taken at same time as Shale H, different times and days to Shale F

## Sheet: WetChem_Shale G
Shale G pH	Time (Days)
Sample	2010-07-02	2010-07-02	2010-07-02	2010-07-02	2010-07-02	2010-07-02	2010-07-03	2010-07-05	2010-07-23	2010-07-31	2010-10-10	2012-02-28
	0.01	0.0416667	0.0833333	0.166667	0.333333	1	2	4	21	30	100	600
2_1	2	2.5	2.1	2.1	2.1	2.2	2.4	2.4	2.07
2_2	2	2.6	2.3	2.2	2.2	2.2	2.5	2.3		2.23	2.24	2.05
3_1	3	3.5	3.2	3.4	3.3	3.9	4.4	4.5	4.41
3_2	3	3.7	3.2	3.2	3.2	3.8	4.3	4.6		4.32	2.84	2.19
4_1	4	4.7	4.4	4.4	4.8	5.4	5.8	6.1	4.86
4_2	4	4.8	4.7	4.5	4.8	5.4	5.8	6		4.66	3.17	2.33
5_1	5	5.8	5.5	5.2	5.5	5.9	6.2	6.6	5.14
5_2	5	5.8	5.5	5.1	5.3	5.7	6	6.2		4.75	3.49	2.25
Blank	2		2	2.1	2	2.1	2.3	2.3		2.06	2.07	1.95
Shale G Temp
	0.01	0.0416667	0.0833333	0.166667	0.333333	1	2	4	21	30	100	600
2_1		23.5	24	24.4	24.4	23.8	23.9	23.6	22.4
2_2		23.5	23.8	24.4	24.5	23.8	23.8	23.7		22.5	24.4	23
3_1			23.7	24.4	24.5	23.8	23.9	23.5	22.5
3_2		23.5	23.6	24.3	24.5	23.8	23.8	23.6		22.4	24.4	23
4_1			23.7	24.2	24.2	23.6	23.7	23.4	21.9
4_2			23.4	24.2	24.2	23.7	23.7	23.5		22.5	24.6	23
5_1			23.5	24	24	23.4	23.5	23.2	22
5_2			23.5	24	24	23.4	23.6	23.3		21.9	24.4	23
Blank				24	23.9	23.4	23.5	23.2		21.8	24.4	23
Air					21.6	22	24.4	21.6	20.4	23	23.8	23
Shale G DO
	0.01	0.0416667	0.0833333	0.166667	0.333333	1	2	4	21	30	100	600
2_1		7.9	7.4	7.8	7.8	8.2	8.5	8.4	8
2_2		7.6	7.5	7.8	7.8	8	8.3	8.4		8.3	7.9
3_1		7.9	8	8	7.7	8.2	8.5	8.4	8.4
3_2		7.9	7.9	7.9	7.9	8.2	8.5	8.4		8.2	7.9
4_1		7.6	7.6	7.7	7.7	8.1	8.5	8.4	8.7
4_2		7.9	7.9	7.8	7.9	8	8.4	8.4		8.2	8
5_1		8.6	7.9	7.9	7.8	8.1	8.5	8.4	8.5
5_2		7.9	7.9	7.6	7.7	8.2	8.4	8.3		8.3	8.3
Blank				7.9	8	8.1	8.5	8.4		8.4	8.1
Shale G ORP
	0.01	0.0416667	0.0833333	0.166667	0.333333	1	2	4	21	30	100	600
2_1		447	447	444	439	433	426	418	610
2_2		444	445	444	437	429	422	413		610	599	602
3_1		432	425	416	406	358	323	281	315
3_2		433	425	419	410	365	329	281		330	576	599
4_1		374	353	322	294	244	287	261	329
4_2		358	358	329	296	246	296	256		340	480	566
5_1		231	245	218	205	306	325	266	352
5_2		237	268	246	219	224	295	263		321	423	737
Blank			431	402	392	394	403	397		452	437	569
*Blank is Week 1 Blank, measurements taken at same time as Shale G

## Sheet: WetChem_Shale H
Shale H pH	Time (Days)
sample	2010-07-02	2010-07-02	2010-07-02	2010-07-02	2010-07-02	2010-07-02	2010-07-03	2010-07-05	2010-07-23	2010-07-31	2010-10-10	2012-02-28
	0.01	0.0416667	0.0833333	0.166667	0.333333	1	2	4	21	30	100	600
2_1	2	2.3	2.4	2.4	2.7	3.7	5.1	6.4	7.09
2_2	2	2.5	2.4	2.5	2.6	3.3	4.8	6.1		7.17	7.56	4.89
3_1	3	3.4	3.7	4.2	6	7.1	7.3	7.4	7.91
3_2	3	3.5	3.8	4.5	6.3	7.1	7.4	7.5		7.97	7.78	5.47
4_1	4	6.2	6.5	6.8	7.1	7.5	7.5	7.7	8
4_2	4	6	6.5	6.8	7.1	7.4	7.8	7.7		8.04	8.04	5.49
5_1	5	6.8	6.8	7	7.1	7.4	7.6	7.7	8.01
5_2	5	6.9	7	7.1	7.2	7.5	7.5	7.8		7.96	8.01	4.97
Blank	2	2.3	2.3	2.3	2.3	2.3	2.3	2.1		2.13	2.14	1.95
Shale H Temp
	0.01	0.0416667	0.0833333	0.166667	0.333333	1	2	4	21	30	100	600
2_1		23.8	24.1	24	24	23.7	23.5	23.9	23.6
2_2		24.1	24.2	24.1	24	23.8	23.7	24		20.7	22.9	23
3_1		23.6	24	24.2	24	23.8	23.6	23.9	23.8
3_2		24	24.3	24.4	24.2	23.9	23.8	24.1		21	23.1	23
4_1		23.5	23.85	24.1	24	23.7	23.5	23.8	23.6
4_2		23.7	24.1	24.4	24.2	24	23.8	24.2		21	23.2	23
5_1		23.4	23.6	24	23.9	23.5	23.3	23.6	24
5_2		23.5	23.8	24.2	24.1	23.7	23.6	24		20.7	23.1	23
Blank		23.5	23.6	23.8	23.7	23.4	23.3	23.7		19.7	22.2	23
Air	23.2	23.2	23.2	23.4	23.5	23.4	23.3	23.7	21.6	19.4	21.4	23
Shale H DO
	0.01	0.0416667	0.0833333	0.166667	0.333333	1	2	4	21	30	100	600
2_1		7.9	7.9	7.9	8	8.3	8.2	8.2	8.3
2_2		7.9	7.9	7.8	8	8.3	8.3	8.3		8.7	8.1
3_1		8	8	8	8.2	8.3	8.4	8.2	8.3
3_2		7.8	8	8	8.3	8.3	8.2	8		8.9	8
4_1		7.9	8	8	8.4	8.4	8.3	8	8.2
4_2		8	8	8	8.3	8.3	8.3	8.3		8.9	7.9
5_1		8	7.9	8.1	8.3	8.4	8.3	8.3	8.2
5_2		8	8	7.6	8.3	8.2	7.9	8.3		9	8.2
Blank		8	7.9	8.2	8.7	8.2	8.6	8.4		9	8.1
Shale H ORP
	0.01	0.0416667	0.0833333	0.166667	0.333333	1	2	4	21	30	100	600
2_1		458	444	430	418	372	247	218	259
2_2		456	430	427	415	392	287	229		269	257	466
3_1		416	428	400	200	200	177	179	213
3_2		429	409	373	208	198	174	185		224	231	433
4_1		206	235	227	231	190	176	191	212
4_2		215	226	219	223	185	169	179		213	233	426
5_1		295	279	291	286	213	207	250	232
5_2		259	239	219	249	197	190	216		275	249	460
Blank		387	457	410	398	394	401	410		512	478	569
*Blank is Week 2 Blank, measurements taken at same time as Shale H
